# Supplementary material
Source: HighWire-hosted journal article supplement (https://bmjopen.bmj.com/content/8/3/e020804)
Supplement: inline-supplementary-material-1 [file inline-supplementary-material-1.pdf]

## **APPENDIX 1**

### **MEDLINE (OviD) search strategy**

*Ovid MEDLINE(R) Epub Ahead of Print, In-Process & Other Non-Indexed Citations, Ovid MEDLINE(R) Daily and Ovid MEDLINE(R) 1946 to November 2017*

1. randomized controlled trial.pt.
2. controlled clinical trial.pt.
3. (randomised or randomized).ab,ti.
4. placebo.ab.
5. drug therapy.fs.
6. randomly.ab.
7. trial.ab.
8. groups.ab.
9. 1 or 2 or 3 or 4 or 5 or 6 or 7 or 8
10. exp animals/ not humans.sh.
11. 9 not 10
12. exp Diabetic Neuropathies/
13. exp Diabetic Foot/
14. exp Peripheral Nervous System Diseases/
15. neuropath\*.tw.
16. exp Neuralgia/

17. neuralgia.tw.
18. exp Charcot-Marie-Tooth Disease/
19. exp Facial Nerve Diseases/
20. exp Nerve Regeneration/
21. exp Nerve Degeneration/
22. nerve\*.tw.
23. exp Hyperalgesia/
24. allodynia.tw.
25. exp Sensation/
26. sensation.tw.
27. exp Sensation Disorders/
28. an?esthesiomet\*.tw.
29. esthesiomet\*.tw.
30. aesthesiomet\*.tw.
31. (guillain and barre).tw.
32. (polyradiculoneuritis or polyradiculoneuropath\* or polyradiculopath\*).tw.
33. (inflammatory adj3 (polyneuropath\* or mononeuropath\* or polyradiculoneuropath\*)).tw.
34. (amyloid adj3 neuropath\*).tw.
35. (motor and sensory and neuropath\* and hereditary).mp.

36. (hereditary and sensory and autonomic and neuropath\*).mp.
37. (heredit\* adj6 neuropath\*).mp.
38. or/12-37
39. (omega-3 or omega 3).tw.
40. (PUFA\* or LCPUFA\* or polyunsaturated or poly-unsaturated).tw.
41. eicosapentaenoic.tw.
42. EPA.tw.
43. docosahexaenoic.tw.
44. DHA.tw.
45. exp Alpha-Linolenic Acid/
46. alpha-linolenic.tw.
47. Fatty acids/
48. Fatty Acids, Unsaturated/
49. Fatty Acids, Essential/
50. exp Fatty Acids, Omega-3/
51. (Fatty adj3 acid\*).tw.
52. or/39-51
53. 11 and 38 and 53

## **APPENDIX 2**

## **EMBASE (OVID) search strategy**

*Embase Classic + Embase 1947 to November 2017*

1. exp Randomized Controlled Trial/
2. Exp controlled clinical trial
3. (randomised or randomized).ab,ti.
4. placebo.ab.
5. drug therapy.fs.
6. randomly.ab.
7. trial.ab.
8. groups.ab.
9. 1 or 2 or 3 or 4 or 5 or 6 or 7 or 8
10. exp animals/ not humans.sh.
11. 9 not 10
12. exp neuropathy/
13. exp neuralgia/
14. exp nerve regeneration/
15. exp peripheral nervous system/
16. neuropath\*.tw.
17. neuralgia.tw.
18. nerve\*

19. an?esthesiomet\*.tw.
20. esthesiomet\*.tw.
21. aesthesiomet\*.tw.
22. Sensation\*.tw.
23. exp sensation\*/
24. exp hyperalgesia/
25. exp allodynia/
26. hyperalgesia.tw.
27. allodynia.tw.
28. (guillain and barre).tw.
29. (polyradiculoneuritis or polyradiculoneuropath\* or polyradiculopath\*).tw.
30. (inflammatory adj3 (polyneuropath\* or mononeuropath\* or polyradiculoneuropath\*)).tw.
31. (amyloid adj3 neuropath\*).tw.
32. (motor and sensory and neuropath\* and hereditary).mp.
33. (hereditary and sensory and autonomic and neuropath\*).mp.
34. (heredit\* adj6 neuropath\*).mp.
35. or/12-34
36. exp unsaturated fatty acid/
37. exp fish oil/

38. (PUFA\* or LCPUFA\* or polyunsaturated or poly-unsaturated).tw.
39. (omega-3 or omega 3).tw.
40. eicosapentaenoic.tw.
41. docosahexaenoic.tw.
42. alpha-linolenic.tw.
43. (Fatty adj3 acid\*).tw.
44. EPA.tw.
45. DHA.tw.
46. or/36-45
47. 11 and 35 and 46

### **APPENDIX 3**

#### **Cochrane Central Register of controlled Trials (CENTRAL) search strategy**

1. MeSH descriptor: [Diabetic Neuropathies] explode all trees
2. MeSH descriptor: [Diabetic Foot] explode all trees
3. MeSH descriptor: [Peripheral Nervous System Diseases] explode all trees
4. MeSH descriptor: [Neuralgia] explode all trees
5. MeSH descriptor: [Charcot-Marie-Tooth Disease] explode all trees
6. MeSH descriptor: [Facial Nerve Diseases] explode all trees
7. MeSH descriptor: [Nerve Regeneration] explode all trees

8. MeSH descriptor: [Nerve Degeneration] explode all trees
9. (neuropath\* or Neuralgia\* or nerve\*):ti,ab,kw
10. MeSH descriptor: [Hyperalgesia] explode all trees
11. MeSH descriptor: [Sensation] explode all trees
12. MeSH descriptor: [Sensation Disorders] explode all trees
13. (sensation\* or hyperalgesia or allodynia):ti,ab,kw
14. (an?esthesiomet\* OR esthesiomet\* OR aesthesiomet\*):ti,ab,kw
15. #1 or #2 or #3 or #4 or #5 or #6 or #7 or #8 or #9 or #10 or #11 or #12 or #13 or #14
16. (omega-3 or omega 3 or ω-3 or ω3 or "ω 3"):ti,ab,kw
17. (PUFA\* or LCPUFA\* or polyunsaturated or poly-unsaturated):ti,ab,kw
18. MeSH descriptor: [Eicosapentaenoic Acid] explode all trees
19. (Eicosapentaenoic OR EPA):ti,ab,kw
20. MeSH descriptor: [Docosahexaenoic Acids] explode all trees
21. (Docosahexaenoic OR DHA):ti,ab,kw
22. MeSH descriptor: [Alpha-Linolenic Acid] explode all trees
23. (Alpha-Linolenic):ti,ab,kw
24. MeSH descriptor: [Fatty acids] this term only
25. MeSH descriptor: [Fatty Acids, Unsaturated] this term only
26. MeSH descriptor: [Fatty Acids, Essential] this term only
27. MeSH descriptor: [Fatty Acids, Omega-3] explode all trees

28. (Fatty near/3 acid\*):ti,ab,kw

29. #16 or #17 or #18 or #19 or #20 or #21 or #22 or #23 or #24 or #25 or #26 or #27 or #28

30. #15 and #29

#### **APPENDIX 4**

##### **US National Institutes of Health Clinical Trials Registry (ClinicalTrials.gov) search strategy**

Condition = neuropathy or nerve or sensation

Intervention = omega-3 or “omega 3” or polyunsaturated OR PUFA or “docosahexaenoic” or DHA OR “eicosapentaenoic” or EPA or “fish oil” or "fish-oil"

#### **APPENDIX 5**

##### **World Health Organisation International Clinical Trials Registry Platform (WHO ICTRP) search strategy**

Condition = nerve disorders or nerve disease or neuropathy or nerve or sensation

Intervention = omega-3 or omega 3 or polyunsaturated or PUFA or docosahexaenoic or eicosapentaenoic or fish oil
